# Supplementary material for: A novel miniature cell retainer for correlative high-content analysis of individual untethered non-adherent cells
Source: Royal Society of Chemistry journal article supplement (doi:10.1039/b603961h), 2006-01-01
Supplement: b603961h-s1.pdf [file b603961h-s1.pdf]

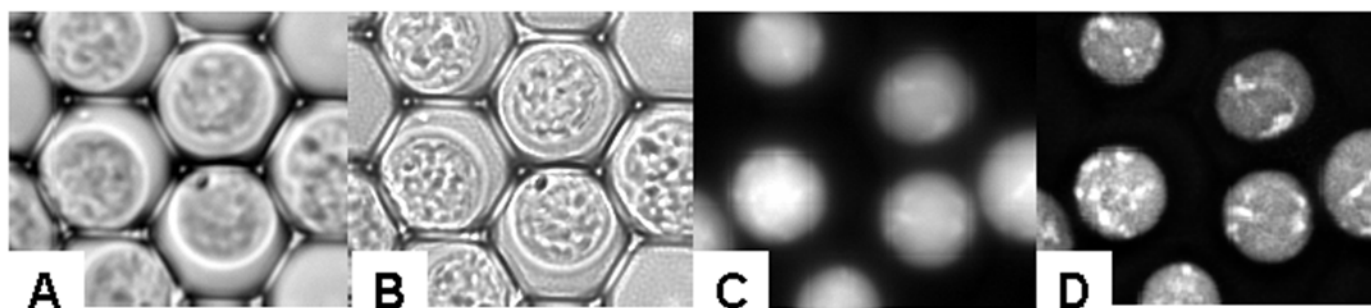

**Supplementary Figure S1.** By applying blind deconvolution to diffusive-convoluted bright-field (A) and fluorescent (C) images, an impressive enhancement was obtained, as shown in images (B) and (D) respectively (here a set of R123-stained Molt 4 cells is shown).
