# Supplementary material for: A novel miniature cell retainer for correlative high-content analysis of individual untethered non-adherent cells
Source: Royal Society of Chemistry journal article supplement (doi:10.1039/b603961h), 2006-01-01
Supplement: b603961h-s3.pdf [file b603961h-s3.pdf]

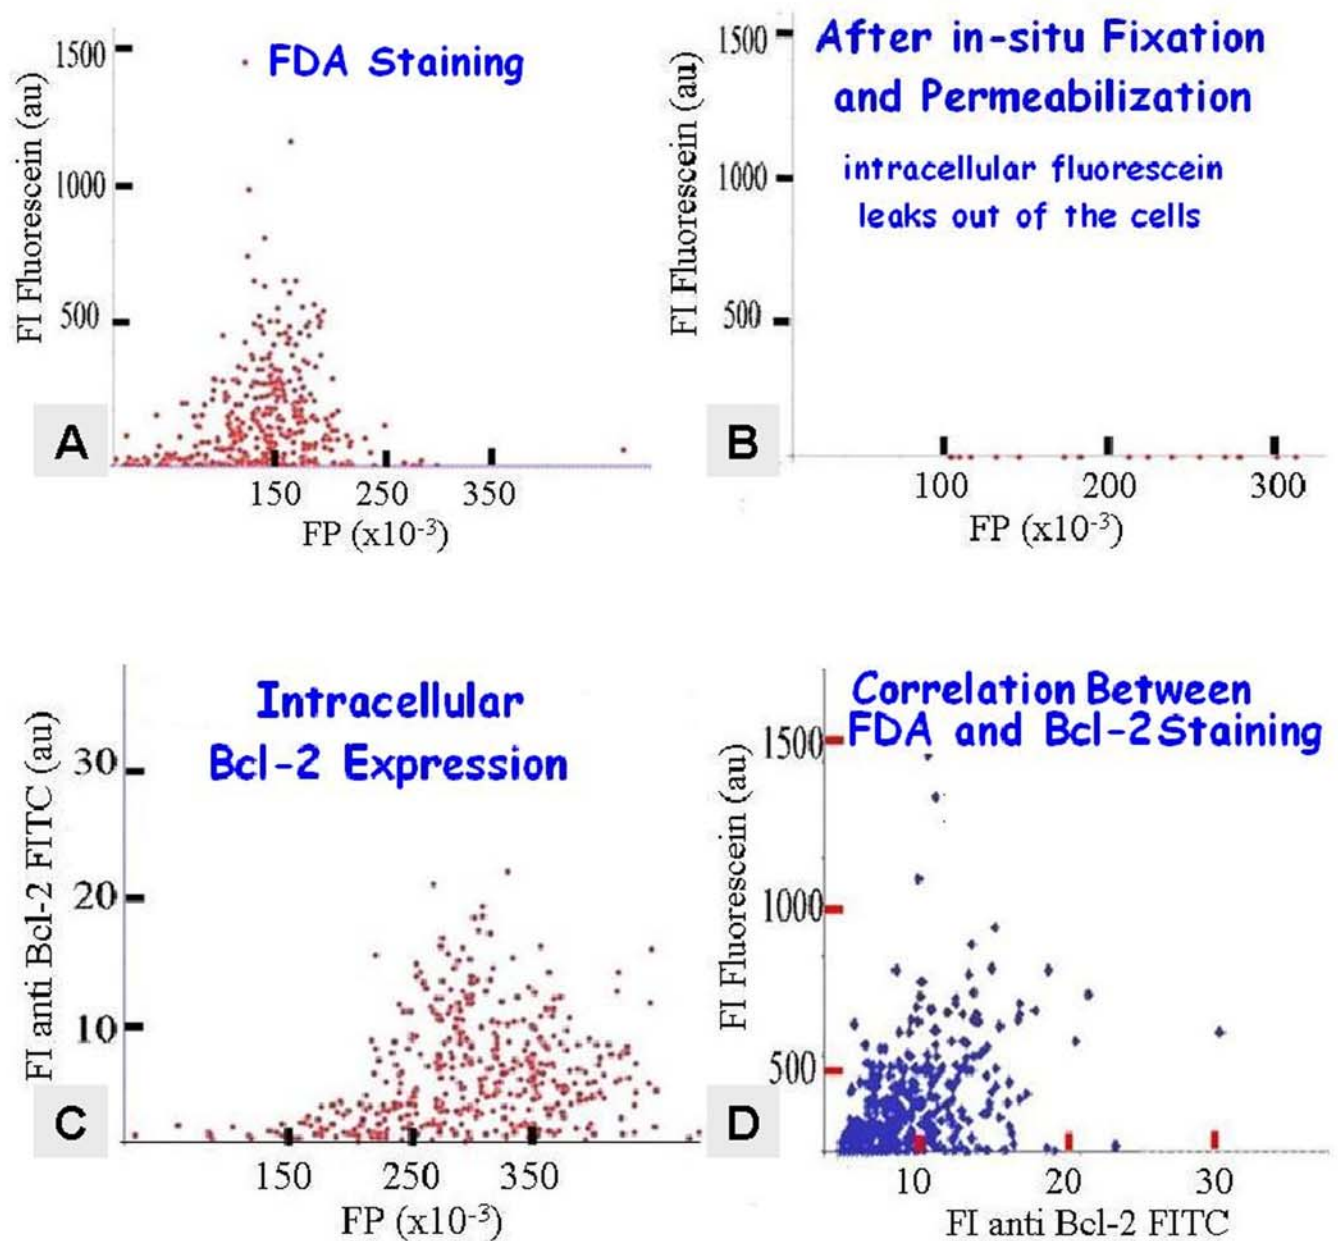

**Supplementary Figure S3.** (A) A scattergram of FI versus FP of FDA-stained peripheral lymphocytes. Following in situ permeabilization of the same cells, intracellular fluorescein is released. Consequently the FI could not be detected by the camera, thus only yielding background signals. (B). Then, the sample was incubated with anti-Bcl-2 mAb, followed by FITC-conjugated anti-mouse IgG, and the fluorescence was measured again, showing the frequency of Bcl-2 protein expression (C). Finally, intracellular esterase activity on FDA substrate and Bcl-2 protein expression are correlated at a single cell resolution (D).
